# Supplementary material for: Human ILC1: To Be or Not to Be
Source: PubMed Central journal article supplement — Immunity. 2017 May 16;46(5):756–7. doi: 10.1016/j.immuni.2017.05.001 (PMC5441993; doi:10.1016/j.immuni.2017.05.001), 2017-05-16

**Immunity, Volume 46**

**Supplemental Information**

**Human ILC1: To Be or Not to Be**

**Jochem H. Bernink, Jenny Mjösberg, and Hergen Spits**

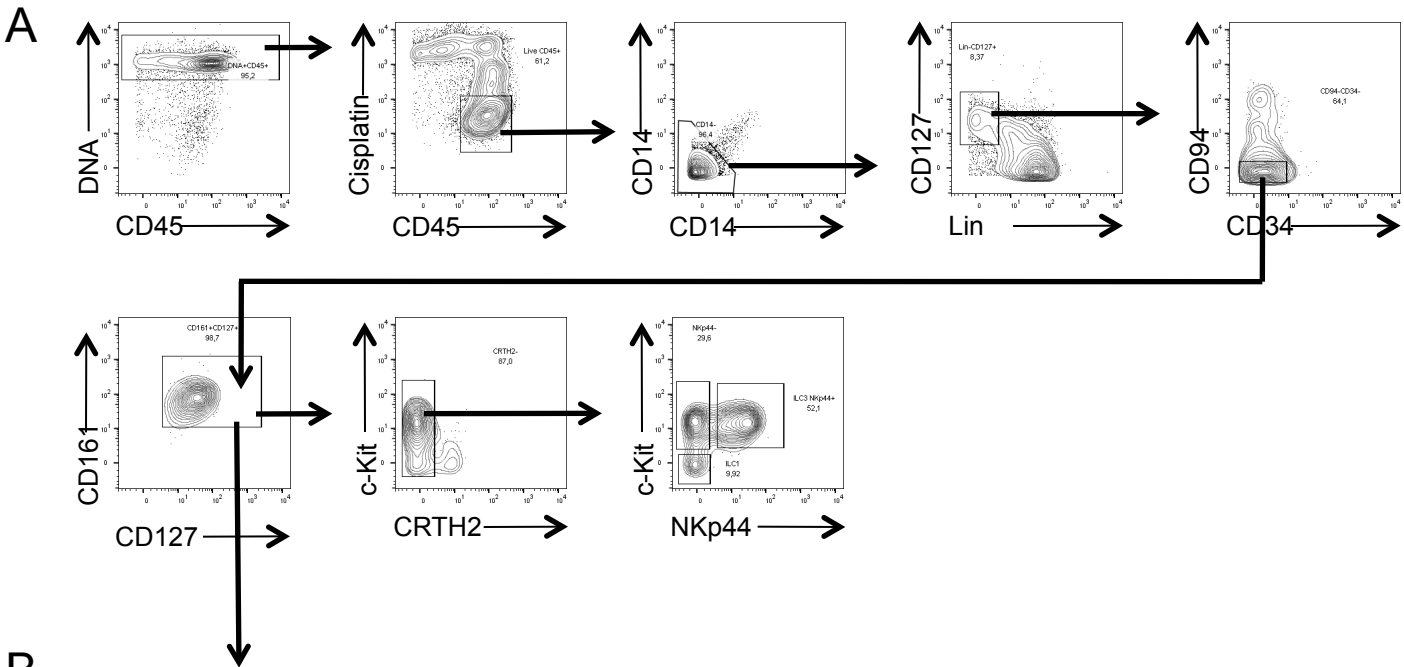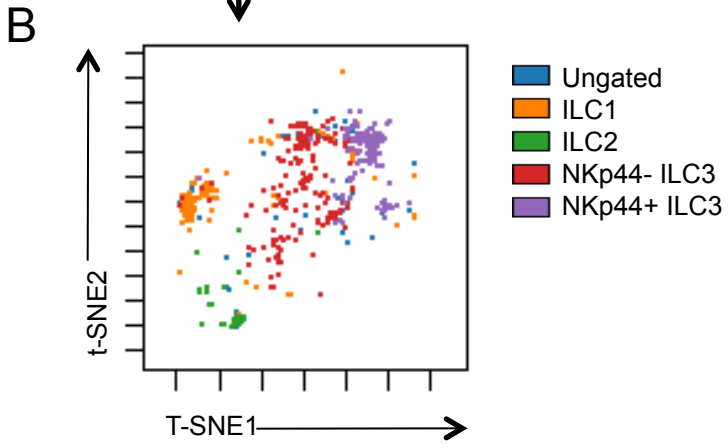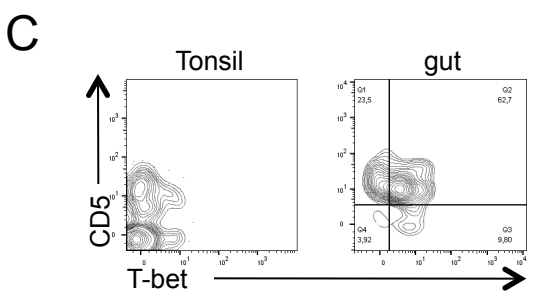

Supplement: mmc1.pdf [file mmc1.pdf]
